# Supplementary material for: Tissue engineering the human auricle by auricular chondrocyte-mesenchymal stem cell co-implantation
Source: PLoS One. 2018 Oct 24;13(10):e0202356. doi: 10.1371/journal.pone.0202356 (PMC6200177; doi:10.1371/journal.pone.0202356)
Supplement: S1 File — Human auricular chondrocyte expansion dataset. (XLSX) [file pone.0202356.s005.xlsx]

## Sheet: Sheet1
Human AuC Log
Date	Age	Sex	Tissue Mass	P0 (x10^6)	Plating Density (cells/cm^2)x10^3	P1 Date	P1	P2 Date	P2	P3 Date	P3	Used For	Notes
2014-05-07	32	F	NA	5.1		2014-05-19	NA	2014-05-21	8.03	2014-05-28	24.08	AuC Sheet Gel	Did not take sufficient notes
2014-08-08	10	M	NA	7.28	12.1333	2014-08-18	8.25	2014-08-24	24.75	2014-09-02	103.1	Co-Implant Gels
2014-11-05	35	M	NA	NA									Almost no cells after digestion
2015-03-06	29	F	NA	5.1		2015-03-16	7.8	2015-03-19	19.2	2015-03-25	63.7	Co-Culture Gels	Cultrured Up to 3 weeks
2015-03-19	64	M	NA	5.18
2015-04-24	33	M		Not Digested
2015-06-04	39	F	NA	1.1									Almost no cells after digestion
2015-07-01	38	F	0.7866	9.5	12.6667	2015-07-13	11.85	2015-07-20	30	2015-07-27	96.8	Co-Implant Gels
2015-07-17	14	M	1.0436	5.85	7.8	2015-07-28	24.75	2015-08-04	42.6	2015-08-11	72.7	Co-Implant Gels
2015-09-25	49	F	1.4189	7.43	12.3833	2015-10-12	NA	2015-10-19	22	2015-10-27	118.25	Co-Implant Ear
2015-10-08	33	F	0.5704	5.93	9.88333	2015-10-22	9.75	2015-10-29	23.8	2015-11-09	96.8	Co-Implant Ear
2015-10-13	33	M	1.3944	12.53		2015-10-26	17.5	2015-11-02	22.05	2015-11-12	75.9	Froze Cells, MSCs did not look good
2015-11-04	73	F	0.9919	5.25		2015-11-16	9.075	2015-11-23	13.48	2015-12-01	47.6	Made sheet gel, cultured
2015-12-21	39	F	0.9853	7.58	10.1067	2015-12-30	12.3	2016-01-11	96	2016-01-19	170	Co-Implant Ear
2015-12-21	42	F	0.7129	5.93	9.88333	2015-12-30	6.9	2016-01-12	89	2016-01-20	155.7	Co-Implant Ear
2015-12-23	29	M	0.5356	4.35	7.25	2016-01-06	22.65	2016-01-13	43.5	2016-01-25	119.4	Co-Implant Ear
2015-02-01	49	F	NA	Not digested, sent on a Saturday so no pickup
2015-02-11	32	M	0.447	6.38		2016-02-25	16.25	2016-03-07	34.75	2016-03-16	112.8	Low cell density Co-Implant discs
2016-03-01	36	M	0.2899	1.65		2016-03-14	11.38	2016-03-22	35.5	2016-04-01	103.5	High MSC ratio co-implant discs, INFECTED
2016-03-26	15	F	0.5225	4.28		2016-04-05	22.3	2016-04-12	54	2016-04-20	171.1	High MSC ratio co-implant discs
2016-04-14	49	F	0.5593	7.65		2016-04-26	10.67	2016-05-02	24.4	2016-05-10	127.6	Made High AuC ear
2016-04-18	31	F	0.3275	1.5		2016-04-28	7.25					Frozen after P1
2016-04-27	17	F	1.049	6.1		2016-05-09	11.25	2016-05-16	21.3	2016-05-26	59.4	High MSC Ear
2016-04-28	23	M	0.5773	5.18	8.63333	2016-05-09	8.75	2016-05-16	33.3	2016-05-25	91.9	Co-Implant Ear
2016-05-04	25	F	0.5728	3.45		2016-05-18	11.8	2016-05-30	22.8	NA		All cells infected
2016-08-25	68	F	0.3165	7.58		2016-09-06	14.4					Cells infected 9/14/16
2016-09-08	73	M		NA								Too small, didn't digest
2016-09-30	14	F	0.6973	3.98		2016-10-14	29	2016-10-22	81.5	2016-10-31	316.8	MSCs died (overconfluent), transition to Passaging study
2016-11-17	24	F	0.4286	2.85		2016-11-29	12.38	2016-12-06	55.6	2016-12-15	194.7	hAuC discs for cage study
2016-11-17	36	M	0.8932	10.13		2016-11-29	16.35	2016-12-06	40.2	2016-12-16
			0.720024	5.95619	10.1071						125.35
				8.27221

## Sheet: Sheet2
Human AuC Expansion Data Log
PLOS ONE Data Availability
Date	Age	Sex	Tissue Mass	P0 (x10^6)	Tissue Cell Density (Million cells/g)	Plating Density (cells/cm^2)x10^3	P1 Date	P0 Days	P1	P2 Date	P1 Days	P2	P3 Date	P2 Days	P3	Used For	Notes	Total Days
2014-08-08	10	M	NA	7.28		12.1333	2014-08-18	10	8.25	2014-08-24	6	24.75	2014-09-02	9	103.1	Co-Implant Gels		25
2015-03-06	29	F	NA	5.1			2015-03-16	10	7.8	2015-03-19	3	19.2	2015-03-25	6	63.7	Co-Culture Gels		19
2015-07-01	38	F	0.7866	9.5	12.0773	12.6667	2015-07-13	12	11.85	2015-07-20	7	30	2015-07-27	7	96.8	Co-Implant Gels		26
2015-07-17	14	M	1.0436	5.85	5.6056	7.8	2015-07-28	11	24.75	2015-08-04	7	42.6	2015-08-11	7	72.7	Co-Implant Gels		25
2015-09-25	49	F	1.4189	7.43	5.23645	12.3833	2015-10-12	17	NA	2015-10-19	7	22	2015-10-27	8	118.25	Co-Implant Ear		32
2015-10-08	33	F	0.5704	5.93	10.3962	9.88333	2015-10-22	14	9.75	2015-10-29	7	23.8	2015-11-09	11	96.8	Co-Implant Ear		32
2015-12-21	39	F	0.9853	7.58	7.69309	10.1067	2015-12-30	9	12.3	2016-01-11	12	96	2016-01-19	8	170	Co-Implant Ear		29
2015-12-21	42	F	0.7129	5.93	8.31814	9.88333	2015-12-30	9	6.9	2016-01-12	13	89	2016-01-20	8	155.7	Co-Implant Ear		30
2015-12-23	29	M	0.5356	4.35	8.12173	7.25	2016-01-06	14	22.65	2016-01-13	7	43.5	2016-01-25	12	119.4	Co-Implant Ear		33
2016-04-28	23	M	0.5773	5.18	8.9728	8.63333	2016-05-09	11	8.75	2016-05-16	7	33.3	2016-05-25	9	91.9	Co-Implant Ear		27
Average	30.6		0.828825	6.46875	8.30266			12.125	13.85		8.375	47.525		8.75	115.194			29.25
Std Dev	12.3036		0.304737	1.62396	2.27283			2.74838	6.99732		2.55999	28.87		1.83225	33.1587			3.01188
															17.8077
