# Supplementary material for: Tissue engineering the human auricle by auricular chondrocyte-mesenchymal stem cell co-implantation
Source: PLoS One. 2018 Oct 24;13(10):e0202356. doi: 10.1371/journal.pone.0202356 (PMC6200177; doi:10.1371/journal.pone.0202356)
Supplement: S2 File — Biochemical analyses dataset. (XLSX) [file pone.0202356.s006.xlsx]

## Sheet: Sheet1
Co-Implant Disc Biochem Data
PLOS ONE Data Availability
Sample	Set Number	Mouse	Type	tube (g)	wet sample (g)	dry empty tube (g)	dry+tube (g)	ww (mg)	dw (mg)	water content	Average	std	DNA raw	DNA raw	DNA ww	Average	std	DNA dw	average	std	GAG raw	GAG raw	GAG ww	Average	std	GAG dw	average	std	hypro raw	Hypro raw	Hypro ww	average	std	Hypro dw	average	std
HuAuC1M_1	1	5	1 Month AuCs	1.0103	1.0208		1.0123	10.5	2	80.9524	80.5378	8.82395	4.15043	4.15043	0.395279	6.60291	7.48096	2.07521	37.8977	37.0749	48.8095	55.5084	5.28652	19.2101	13.1804	27.7542	100.936	45.3135	15.2093	328.992	31.3326	36.4961	16.2925	164.496	190.455	42.5268
HuAuC1M_1S		5	1 Month AuCs										0								6.69892								17.6899
HuAuC1M_2	1	6	1 Month AuCs	1.0154	1.0226		1.0171	7.2	1.7	76.3889			1.86584	1.86584	0.259145			1.09755			103.81	116.584	16.1922			68.5787			13.1938	381.705	53.0146			224.533
HuAuC1M_2S		6	1 Month AuCs										0								12.7742								24.9767
HuAuC1M_3	1	7	1 Month AuCs	1.0095	1.0188		1.0106	9.3	1.1	88.172			3.03087	3.06223	0.329272			2.78385			76.2963	83.3178	8.9589			75.7435			16.1395	302.636	32.5415			275.123
HuAuC1M_3S		7	1 Month AuCs										0.031357								7.02151								14.124
HuAuC1M_4	2	9	1 Month AuCs	1.021	1.0271		1.0229	6.1	1.9	68.8525			14.8616	14.8616	2.43633			7.8219			294.314	294.314	48.2482			154.902			37.6899	376.899	61.7868			198.368
HuAuC1M_5	3	2	1 Month AuCs	1.0288	1.0407	1.0098	1.0115	11.9	1.7	85.7143			11.8592	118.592	9.96573			69.7601			7.81633	195.408	16.4209			114.946			16.3478	326.957	27.4753			192.327
HuAuC1M_6	3	6	1 Month AuCs	1.0166	1.0279	1.01	1.0112	11.3	1.2	89.3805			19.2692	96.346	8.5262			80.2883			7.13605	178.401	15.7877			148.668			9.3913	187.826	16.6218			156.522
HuAuC1M_7	3	8	1 Month AuCs	1.0196	1.0257	1.0096	1.0116	6.1	2	67.2131			13.3931	133.931	21.9559			66.9656			6.2517	156.293	25.6217			78.1463			14.971	299.42	49.0853			149.71
HuAuC1M_8	3	10	1 Month AuCs	1.0061	1.0158	1.0099	1.0111	9.7	1.2	87.6289			17.3734	86.8672	8.95539			72.3894			6.65986	166.497	17.1646			138.747			9.75362	195.072	20.1106			162.56
HuMSC1M_1	1	4	1 Month MSCs	1.0222	1.0232		1.023	1	0.8	20	64.9001	26.8487	1.05243	1.05243	1.05243	5.86567	6.65521	1.31554	33.8226	38.4033	9.94828	17.9375	17.9375	5.10862	5.19879	22.4219	19.7723	14.2337	5.44186	198.76	198.76	70.0565	74.9404	248.45	144.505	87.9329
HuMSC1M_1S		4	1 Month MSCs										0								7.98925								14.4341
HuMSC1M_2	1	5	1 Month MSCs	1.0195	1.0219		1.0212	2.4	1.7	29.1667			5.46927	5.66951	2.3623			3.33501			8.45402	8.64757	3.60315			5.08681			9.93798	332.093	138.372			195.349
HuMSC1M_2S		5	1 Month MSCs										0.200248								0.193548								23.2713
HuMSC1M_3	1	6	1 Month MSCs	1.0084	1.0096		1.0086	1.2	0.2	83.3333			0	0	0			0			3.51149	3.54375	2.95313			17.7188			2.18605	NA	NA			NA
HuMSC1M_3S		6	1 Month MSCs										0								0.0322581								13.814
HuMSC1M_4	1	7	1 Month MSCs	1.0183	1.0204		1.0195	2.1	1.2	42.8571			0	0	0			0			0.58046	1.09659	0.522185			0.913824			4.66667	273.178	130.085			227.649
HuMSC1M_4S		7	1 Month MSCs										0								0.516129								22.6512
HuMSC1M_5	2	9	1 Month MSCs	1.015	1.0188		1.0159	3.8	0.9	76.3158			3.2956	3.2956	0.867264			3.66178			4.43103	4.43103	1.16606			4.92337			17.845	178.45	46.9604			198.277
HuMSC1M_6	3	2	1 Month MSCs	1.02	1.0281	1.0095	1.0108	8.1	1.3	83.9506			20.362	101.81	12.5691			78.3154			6.12121	30.6061	3.77853			23.5431			3.5942	71.8841	8.87458			55.2954
HuMSC1M_7	3	6	1 Month MSCs	1.022	1.0271	1.0095	1.0109	5.1	1.4	72.549			18.479	92.3948	18.1166			65.9963			6.9697	34.8485	6.83304			24.8918			2.28986	45.7971	8.97982			32.7122
HuMSC1M_8	3	8	1 Month MSCs	1.0241	1.0341	1.01	1.0108	10	0.8	92			13.0234	65.1168	6.51168			81.3961			6.78788	33.9394	3.39394			42.4242			1.71014	34.2029	3.42029			42.7536
HuMSC1M_9	3	10	1 Month MSCs	1.0122	1.0178	1.0098	1.0107	5.6	0.9	83.9286			12.669	63.3449	11.3116			70.3832			6.48485	32.4242	5.79004			36.0269			7	140	25			155.556
Hu501M_1	1	4	1 Month 50:50	1.0193	1.0292		1.0206	9.9	1.3	86.8687	75.7215	20.0093	1.90522	1.90522	0.192446	8.19357	9.29128	1.46555	49.9926	55.1325	131.852	184.101	18.596	14.4413	7.65661	141.616	69.6189	35.4723	12.2636	342.946	34.641	42.0258	33.1906	263.804	173.028	65.7152
Hu501M_1S		4	1 Month 50:50										0								52.2487								22.031
Hu501M_2	1	5	1 Month 50:50	1.0107	1.0142		1.0132	3.5	2.5	28.5714			6.60583	6.60583	1.88738			2.64233			85.8201	88.5943	25.3127			35.4377			15.9845	389.457	111.274			155.783
Hu501M_2S		5	1 Month 50:50										0								2.77419								22.9612
Hu501M_3	1	7	1 Month 50:50	1.0218	1.0277		1.0229	5.9	1.1	81.3559			1.74346	1.74346	0.295502			1.58496			63.8889	64.7276	10.9708			58.8433			7.92248	220.465	37.367			200.423
Hu501M_3S		7	1 Month 50:50										0								0.83871								14.124
Hu501M_4	2	9	1 Month 50:50	1.0272	1.0307		1.0283	3.5	1.1	68.5714			11.7266	11.7266	3.35047			10.6606			85.291	85.291	24.3689			77.5373			24.0465	240.465	68.7043			218.605
Hu501M_5	3	2	1 Month 50:50	1.0222	1.0342	1.01	1.0118	12	1.8	85			14.7731	147.731	12.3109			82.0726			7.13605	178.401	14.8668			99.1119			18.1594	363.188	30.2657			201.771
Hu501M_6	3	6	1 Month 50:50	1.0116	1.0187	1.0099	1.0112	7.1	1.3	81.6901			19.8669	198.669	27.9816			152.823			11.9394	59.697	8.40802			45.9207			9.3913	187.826	26.4544			144.482
Hu501M_7	3	8	1 Month 50:50	1.0201	1.0285	1.01	1.0112	8.4	1.2	85.7143			17.7152	88.5758	10.5447			73.8131			12.4848	62.4242	7.43146			52.0202			9.3913	187.826	22.3602			156.522
Hu501M_8	3	10	1 Month 50:50	1.0065	1.014	1.01	1.0109	7.5	0.9	88			13.4783	67.3913	8.98551			74.8793			8.36364	41.8182	5.57576			46.4646			1.92754	38.5507	5.1401			42.8341
HuAuC3M_1	1	9	3 Month AuCs	1.0232	1.0281		1.0247	4.9	1.5	69.3878	74.7212	14.5507	2.55503	2.55503	0.521434	3.78278	3.38714	1.70335	27.1944	30.6418	59.3915	149.974	30.6068	28.1159	9.82017	99.9824	132.206	49.8392	7.92248	248.372	50.6882	27.3846	22.5866	165.581	91.078	65.2837
HuAuC3M_1S		9	3 Month AuCs										0								90.582								16.9147
HuAuC3M_2	1	11	3 Month AuCs	1.0142	1.0196		1.0155	5.4	1.3	75.9259			1.7222	1.79765	0.332898			1.38281			14.546	140.578	26.0329			108.137			4.20155	237.519	43.9851			182.707
HuAuC3M_2S		11	3 Month AuCs										0.0754498								126.032								19.5504
HuAuC3M_3	1	13	3 Month AuCs	1.0252	1.0303		1.0271	5.1	1.9	62.7451			4.58708	4.58708	0.899428			2.41425			67.5926	131.481	25.7807			69.2008			5.28682	166.202	32.5885			87.4745
HuAuC3M_3S		13	3 Month AuCs										0								63.8889								11.3333
HuAuC3M_4	2	8	3 Month AuCs	1.0192	1.0235		1.0213	4.3	2.1	51.1628			15.2646	15.2646	3.54991			7.26887			205.098	205.098	47.6972			97.6657			22.186	221.86	51.5955			105.648
HuAuC3M_5	3	1	3 Month AuCs	1.0208	1.0325	1.0099	1.0112	11.7	1.3	88.8889			12.8245	64.1224	5.48055			49.3249			9.9932	249.83	21.353			192.177			2.07246	41.4493	3.54267			31.8841
HuAuC3M_6	3	7	3 Month AuCs	1.0202	1.0326	1.0099	1.0111	12.4	1.2	90.3226			16.981	84.9048	6.84716			70.754			8.22449	205.612	16.5816			171.344			0.623188	12.4638	1.00514			10.3865
HuAuC3M_7	3	9	3 Month AuCs	1.0191	1.0269	1.01	1.0112	7.8	1.2	84.6154			13.803	69.0152	8.8481			57.5127			8.97279	224.32	28.7589			186.933			3.23188	64.6377	8.28688			53.8647
HuMSC3M_1	1	9	3 Month MSCs	1.0199	1.0205		1.0201	0.6	0.2	66.6667	56.0912	14.5234	0.527037	0.611344	1.01891	7.17347	6.66492	3.05672	18.322	18.1559	0.465517	0.465517	0.775862	2.629	2.6574	2.32759	5.3622	3.32481	0	69.9225	116.537	67.4493	32.7478	349.612	162.822	97.4849
HuMSC3M_1S		9	3 Month MSCs										0.0843077								0								6.99225
HuMSC3M_2	1	11	3 Month MSCs	1.015	1.0179		1.017	2.9	2	31.0345			1.00825	1.07877	0.371991			0.539387			12.4195	23.1507	7.98301			11.5754			8.07752	200.31	69.0724			100.155
HuMSC3M_2S		11	3 Month MSCs										0.0705287								10.7312								11.9535
HuMSC3M_4	3	1	3 Month MSCs	1.018	1.02	1.0098	1.0104	2	0.6	70			4.46857	8.93713	4.46857			14.8952			3.50427	3.50427	1.75214			5.84046			3.30435	66.087	33.0435			110.145
HuMSC3M_5	3	5	3 Month MSCs	1.0308	1.0328	1.0098	1.0108	2	1	50			7.83584	15.6717	7.83584			15.6717			2.90598	2.90598	1.45299			2.90598			9.53623	190.725	95.3623			190.725
HuMSC3M_6	3	7	3 Month MSCs	1.0216	1.0236	1.01	1.0107	2	0.7	65			17.6505	35.3009	17.6505			50.4299			3.67521	3.67521	1.83761			5.25031			4.31884	86.3768	43.1884			123.395
HuMSC3M_7	3	9	3 Month MSCs	1.0134	1.0147	1.0096	1.0102	1.3	0.6	53.8462			7.60178	15.2036	11.6951			25.3393			2.5641	2.5641	1.97239			4.2735			3.08696	61.7391	47.4916			102.899
Hu503M_1	1	9	3 Month 50:50	1.0119	1.019		1.0136	7.1	1.7	76.0563	80.7253	7.65897	2.03999	2.03999	0.287322	5.37923	5.32974	1.19999	35.6397	34.5478	114.921	164.788	23.2096	22.138	5.50708	96.9343	128.362	51.0255	4.66667	200.31	28.2127	20.7522	13.0469	117.829	118.538	98.0462
Hu503M_1S		9	3 Month 50:50										0								49.8677								15.3643
Hu503M_2	1	11	3 Month 50:50	1.0152	1.0233		1.017	8.1	1.8	77.7778			0.51613	0.51613	0.0637197			0.286739			53.836	232.463	28.6992			129.146			2.18605	335.194	41.382			186.219
Hu503M_2S		11	3 Month 50:50										0								178.627								31.3333
Hu503M_3	1	13	3 Month 50:50	1.0102	1.0161		1.0115	5.9	1.3	77.9661			1.07794	1.07794	0.182702			0.829184			60.7143	100	16.9492			76.9231			2.65116	122.791	20.812			94.4544
Hu503M_3S		13	3 Month 50:50										0								39.2857								9.62791
Hu503M_5	3	1	3 Month 50:50	1.0237	1.0363	1.0095	1.0116	12.6	2.1	83.3333			13.8898	138.898	11.0237			66.1419			10.6735	266.837	21.1775			127.065			5.62319	112.464	8.9257			53.5542
Hu503M_6	3	5	3 Month 50:50	1.0192	1.0215	1.0098	1.0105	2.3	0.7	69.5652			14.6301	29.2602	12.7218			41.8002			12.2424	61.2121	26.614			87.4459			2.14493	42.8986	18.6515			61.2836
Hu503M_7	3	7	3 Month 50:50	1.0213	1.026	1.0099	1.0103	4.7	0.4	91.4894			16.1006	32.2013	6.85133			80.5032			12.3636	61.8182	13.1528			154.545			6.05797	121.159	25.7786			302.899
Hu503M_8	3	9	3 Month 50:50	1.0201	1.0255	1.0099	1.0105	5.4	0.6	88.8889			17.615	35.23	6.52408			58.7167			5.43537	135.884	25.1638			226.474			0.405797	8.11594	1.50295			13.5266
HuNat 1A			Native	1.0179	1.0272		1.0206	9.3	2.7	70.9677	71.3491	1.51259	7.30607	7.30607	0.785599			2.70595			176.667	176.667	18.9964	17.7735	3.75148	65.4321	62.5587	16.01	23.4264	234.264	25.1896	26.2919	5.24967	86.7643	91.3405	13.8608
HuNat 1B			Native	1.0223	1.0286		1.024	6.3	1.7	73.0159			5.51362	5.51362	0.875178			3.24331			130.794	130.794	20.7609			76.9374			13.6589	136.589	21.6808			80.3466
HuNat 1C			Native	1.014	1.0297		1.0187	15.7	4.7	70.0637			14.8174	14.8174	0.943783			3.15264			212.941	212.941	13.5631			45.3066			50.2481	502.481	32.0051			106.911

## Sheet: Sheet2
Co-Implant Ear Biochem Data
PLOS ONE Data Availability
Sample	Cell Ratio (AuC:MSC)	tube (g)	wet sample (g)	dry empty tube (g)	dry+tube (g)	ww (mg)	dw (mg)	water content	Average	std	DNA raw	DNA undilute	DNA ww	Average	std	DNA dw	average	std	GAG raw	GAG raw	GAG ww	Average	std	GAG dw	average	std	hypro raw	Hypro raw	Hypro ww	average	std	Hypro dw	average	std
HuCo3_M1	1:1	1.0084	1.0154	1.0098	1.0113	7	1.5	78.5714	77.9683	3.70369	16.0503	32.1006	4.58579	4.00538	1.0062	21.4004	18.0917	3.10815	3.86232	19.3116	2.7588	1.6064	1.00006	12.8744	7.41962	4.74868	5.11594	102.319	14.617	17.7902	2.83836	68.2126	81.8234	16.3782
HuCo3_M2	1:1	1.0039	1.0114	1.0098	1.0112	7.5	1.4	81.3333			10.6632	21.3264	2.84352			15.2331			7.24638	7.24638	0.966184			5.17598			7	140	18.6667			100
HuCo3_M3	1:1	1.0043	1.0143	1.0098	1.0124	10	2.6	74			9.17368	45.8684	4.58684			17.6417			10.942	10.942	1.0942			4.20847			10.0435	200.87	20.087			77.2575
HuCo4_M1	1:1	1.0068	1.0152	1.01	1.0106	8.4	0.6	92.8571	90.317	4.77381	16.7329	33.4657	3.98402	3.22802	1.41417	55.7762	35.5205	17.6168	8.13768	40.6884	4.84386	15.6476	9.83775	67.814	164.848	100.31	5.26087	105.217	12.5259	17.585	8.22675	175.362	183.145	11.0659
HuCo4_M2	1:1	1.0126	1.026	1.0098	1.0107	13.4	0.9	93.2836			10.6968	21.3935	1.59653			23.7706			9.65306	241.327	18.0094			268.141			8.81159	176.232	13.1516			195.813
HuCo4_M3	1:1	0.9977	1.0056	1.0096	1.0108	7.9	1.2	84.8101			16.2088	32.4176	4.1035			27.0147			7.61224	190.306	24.0894			158.588			10.6957	213.913	27.0776			178.261
HuCo5_M1	1:1	1.0069	1.0194	1.0099	1.0104	12.5	0.5	96	93.0876	4.23029	4.21322	4.21322	0.337058	0.910283	0.816716	8.42644	11.7136	3.67801	10.6735	266.837	21.3469	24.0661	5.39851	533.673	401.576	138.526	6.56522	131.304	10.5043	12.3334	1.73543	262.609	211.139	80.2815
HuCo5_M2	1:1	0.9916	1.0097	1.01	1.0109	18.1	0.9	95.0276			9.92551	9.92551	0.548371			11.0283			14.8912	372.279	20.5679			413.643			11.3478	226.957	12.539			252.174
HuCo5_M3	1:1	0.999	1.0109	1.0098	1.0112	11.9	1.4	88.2353			10.9802	21.9605	1.84542			15.6861			14.415	360.374	30.2835			257.41			8.30435	166.087	13.9569			118.634
HuCo7_M1	1:1	1.0071	1.0178	1.0097	1.0111	10.7	1.4	86.9159	90.4747	3.09498	21.5331	107.666	10.0622	5.19027	4.29456	76.904	49.6242	26.344	11.2273	112.273	10.4928	12.6202	6.91225	80.1948	142.562	96.2405	7.65217	153.043	14.3031	16.2662	2.28579	109.317	185.565	71.6871
HuCo7_M2	1:1	1.0111	1.0245	1.0099	1.0109	13.4	1	92.5373			9.52807	47.6404	3.55525			47.6404			9.40909	94.0909	7.02171			94.0909			12.5797	251.594	18.7757			251.594
HuCo7_M3	1:1	1.0141	1.0278	1.0099	1.011	13.7	1.1	91.9708			13.3805	26.761	1.95336			24.3282			11.1497	278.741	20.3461			253.401			10.7681	215.362	15.7199			195.784
HuCo8_M1	1:1	0.9848	0.9989	1.0097	1.0108	14.1	1.1	92.1986	88.6596	4.95238	6.512	32.56	2.30922	7.94914	7.29098	29.6	60.9605	32.8887	13.7347	343.367	24.3523	26.7774	5.72544	312.152	251.315	58.2819	9.97101	199.42	14.1433	11.0647	4.48377	181.291	107.581	64.1661
HuCo8_M2	1:1	0.9998	1.0139	1.0098	1.0111	14.1	1.3	90.7801			7.55194	75.5194	5.35599			58.0919			12.7823	319.558	22.6637			245.814			4.17391	83.4783	5.92044			64.214
HuCo8_M3	1:1	1.0036	1.0136	1.01	1.0117	10	1.7	83			16.1822	161.822	16.1822			95.1896			13.3265	333.163	33.3163			195.978			6.56522	131.304	13.1304			77.2379
1:1 Ears									87.9619	6.78249				4.25662	2.79906							13.4851	9.28235							15.9937	2.53191
HuNat 1A		1.0179	1.0272		1.0206	9.3	2.7	70.9677	71.3491	1.51259	7.30607	7.30607	0.785599			2.70595			176.667	176.667	18.9964	17.7735	3.75148	65.4321	62.5587	16.01	23.4264	234.264	25.1896	26.2919	5.24967	86.7643	91.3405	13.8608
HuNat 1B		1.0223	1.0286		1.024	6.3	1.7	73.0159			5.51362	5.51362	0.875178			3.24331			130.794	130.794	20.7609			76.9374			13.6589	136.589	21.6808			80.3466
HuNat 1C		1.014	1.0297		1.0187	15.7	4.7	70.0637			14.8174	14.8174	0.943783			3.15264			212.941	212.941	13.5631			45.3066			50.2481	502.481	32.0051			106.911
