# Supplementary material for: Tissue engineering the human auricle by auricular chondrocyte-mesenchymal stem cell co-implantation
Source: PLoS One. 2018 Oct 24;13(10):e0202356. doi: 10.1371/journal.pone.0202356 (PMC6200177; doi:10.1371/journal.pone.0202356)
Supplement: S3 File — Biomehcanical analysis dataset. (XLSX) [file pone.0202356.s007.xlsx]

## Sheet: Sheet1
Human Co-Implant Disc and Native Mechanical Data
PLOS ONE Data Availability
Diameter	3mm
Name	Height	Step Size	# Steps	Equilibrium Modulus (Ha) (kPa)	Hydraulic Permeability
HuAuC_1M_5	1.47	0.07	11	263843	2.93385e-14
HuAuC_1M_6	1.48	0.07	11	288894	2.96615e-14
HuAuC_1M_8	1.35	0.07	10	279061	2.16955e-14
HuMSC_1M_6	1.22	0.06	11	196.525	3.11324e-14
HuMSC_1M_9	1.17	0.06	11	209.895	3.4038e-14
Hu50_1M_5	1.22	0.06	11	230.097	2.90872e-14
Hu50_1M_6	1.17	0.06	7	300.9	2.08271e-14
Hu50_1M_7	1.36	0.07	9	461.252	2.00381e-14
HuAuC_3M_5	1.18	0.06	10	150.824	5.7074e-14
HuAuC_3M_6	1.26	0.06	11	277.233	3.72035e-14
HuAuC_3M_7	1.24	0.06	11	227.054	2.95104e-14
Hu50_3M_5	1.06	0.05	11	204.564	2.16715e-14
Hu50_3M_6	1.13	0.06	9	383.279	2.26749e-14
Hu50_3M_8	0.95	0.05	11	250.751	2.20798e-14
Native 1	1.26	0.06	11	217.736	2.63422e-14
Native 2	1.24	0.06	9	272.532	2.30623e-14
Native 3	1.43	0.07	10	295.412	3.48843e-14

## Sheet: Sheet2
Human Co-Implant Ear Mechanical Data
PLOS ONE Data Availability
Diameter	3mm
Name	Height	StepSize	# Steps	Equilibrium Modulus (Ha) (kPa)	Hydraulic Permeability
HuCo3_M2	1.72	0.09	9	193.742	9.61775e-14
HuCo3_M3	1.72	0.09	11	134.631	6.79243e-14
HuCo4_M1	1.54	0.08	11	182.654	6.41368e-14
HuCo4_M2	1.9	0.09	11	230.448	9.65237e-14
HuCo4_M3	1.49	0.07	11	228.934	3.64818e-14
HuCo5_M1	1.41	0.07	6	281.644	9.40009e-14
HuCo5_M2	1.85	0.09	7	322.494	8.71942e-14
HuCo7_M1	1.95	0.1	10	212.19	7.52624e-14
HuCo7_M2	1.91	0.1	9	386.391	4.36171e-14
HuCo7_M3	1.9	0.1	7	299.939	6.62678e-14
HuCo8_M1	1.62	0.08	9	243.884	9.43841e-14
HuCo8_M2	1.79	0.09	6	406.896	7.76164e-14
HuCo8_M3	1.73	0.09	5	450.598	4.61587e-14
