# Supplementary material for: Tissue engineering the human auricle by auricular chondrocyte-mesenchymal stem cell co-implantation
Source: PLoS One. 2018 Oct 24;13(10):e0202356. doi: 10.1371/journal.pone.0202356 (PMC6200177; doi:10.1371/journal.pone.0202356)
Supplement: S4 File — Disc construct gross size analysis dataset. (XLSX) [file pone.0202356.s008.xlsx]

## Sheet: Sheet1
Human Co-Implant Disc Size Data
PLOS ONE Data Availability
Notebook date	Animal	Time	Cells	Height (mm)	Diameter (mm)
2015-03-05	A1	1 Month	AuC	2.29	2.77
2015-03-05	A2	1 Month	AuC	1.44	5.44
2015-03-05	A3	1 Month	AuC	1.61	5.25
2015-08-26	A8	1 Month	AuC	1.42	5.75
2015-03-05	A1	1 Month	MSC	1.02	3.58
2015-03-05	A2	1 Month	MSC	1.47	4.8
2015-03-05	A3	1 Month	MSC	1.02	3.45
2015-08-26	A8	1 Month	MSC	1.23	5.03
2015-03-05	A1a	1 Month	50:50	1.21	3.96
2015-03-05	A2a	1 Month	50:50	1.37	3.37
2015-03-05	A3a	1 Month	50:50	1.65	5.37
2015-08-26	A8	1 Month	50:50	1.37	4.46
2015-09-14	A2	1 Month	AuC	1.7	4.3
2015-09-14	A4	1 Month	AuC	1.7	3.8
2015-09-14	A6	1 Month	AuC	1.6	4
2015-09-14	A8	1 Month	AuC	1.7	4.3
2015-09-14	A10	1 Month	AuC	1.6	4.1
2015-09-14	A2	1 Month	MSC	1	4.4
2015-09-14	A4	1 Month	MSC	0.9	3.4
2015-09-14	A8	1 Month	MSC	1.5	3.5
2015-09-14	A10	1 Month	MSC	1.1	4
2015-09-14	A2	1 Month	50:50	1.8	3.9
2015-09-14	A4	1 Month	50:50	2.1	2.9
2015-09-14	A6	1 Month	50:50	0.7	3.1
2015-09-14	A8	1 Month	50:50	1.2	3.1
2015-09-14	A10	1 Month	50:50	1.8	2.1
2015-03-05	A8	3 Month	AuC	1.43	5.95
2015-03-05	A10	3 Month	AuC	1.3	5
2015-08-26	A9	3 Month	AuC	1.45	5.37
2015-03-05	A8	3 Month	MSC	0.95	2.81
2015-03-05	A14	3 Month	MSC	1.11	2.7
2015-08-26	A9	3 Month	MSC	0.66	1.74
2015-03-05	A8	3 Month	50:50	1.75	5.32
2015-03-05	A10	3 Month	50:50	1.18	5.63
2015-03-05	A14	3 Month	50:50	1.14	5.33
2015-08-26	A9	3 Month	50:50	1.58	3.5
2015-11-13	A1	3 Month	AuC	1.5	4.2
2015-11-13	A3	3 Month	AuC	1.7	5.2
2015-11-13	A5	3 Month	AuC	1.5	3.1
2015-11-13	A7	3 Month	AuC	1.2	3.8
2015-11-13	A9	3 Month	AuC	1.3	4.1
2015-11-13	A1	3 Month	MSC	0.9	1.9
2015-11-13	A3	3 Month	MSC	1.1	3.9
2015-11-13	A5	3 Month	MSC	0.4	1.8
2015-11-13	A7	3 Month	MSC	0.2	1.6
2015-11-13	A9	3 Month	MSC	0.1	0.1
2015-11-13	A1	3 Month	50:50	1.6	3.5
2015-11-13	A3	3 Month	50:50	1.2	4.9
2015-11-13	A5	3 Month	50:50	0.7	2.2
2015-11-13	A7	3 Month	50:50	0.9	2.7
2015-11-13	A9	3 Month	50:50	0.6	3.5
