# Supplementary material for: Tissue engineering the human auricle by auricular chondrocyte-mesenchymal stem cell co-implantation
Source: PLoS One. 2018 Oct 24;13(10):e0202356. doi: 10.1371/journal.pone.0202356 (PMC6200177; doi:10.1371/journal.pone.0202356)
Supplement: S5 File — Ear construct gross size analysis dataset. (XLSX) [file pone.0202356.s009.xlsx]

## Sheet: Sheet1
Human Co-Implant Full Scale Human Ear Size Data
PLOS ONE Data Availability
Name	Initial Length (cm)	Initial Width (cm)	Explant Length (cm)	Explant Width (cm)	Length Decrease %	Width Decrease %
1	4.98	3	2	1.1	59.8394	63.3333
2	5	3.3	2.4	1.1	52	66.6667
3	5	3	2.3	1.4	54	53.3333
4	5	2.9	3.2	1.9	36	34.4828
5	4.7	2.5	1.8	1.25	61.7021	50
6	5	2.7	2	1.55	60	42.5926
